# Supplementary material for: Sigma-1 Agonist Binding in the Aging Rat Brain: a MicroPET Study with [11C]SA4503
Source: PubMed Central journal article supplement (PMC4927617; doi:10.1007/s11307-015-0917-6), 2015-12-04
Supplement: 11307_2015_917_MOESM1_ESM.pdf [file 11307_2015_917_MOESM1_ESM.pdf]

## Electronic Supplementary Material

# **Sigma-1 Agonist Binding in the Aging Rat Brain: A MicroPET Study with [<sup>11</sup>C]SA4503**

## **Journal: Molecular Imaging and Biology**

Nisha K. Ramakrishnan<sup>1,2</sup>, Anniek K.D. Visser<sup>1</sup>, Anna A. Rybczynska<sup>1</sup>, Csaba J. Nyakas<sup>3,4</sup>, Paul G.M. Luiten<sup>3,4</sup>, Chantal Kwizera<sup>1</sup>, Jurgen W.A. Sijbesma<sup>1</sup>, Philip H. Elsinga<sup>1</sup>, Kiichi Ishiwata<sup>5</sup>, Rudi A.J.O. Dierckx<sup>1</sup>, Aren van Waarde<sup>1</sup>

<sup>1</sup> University of Groningen, University Medical Center Groningen, Department of Nuclear Medicine and Molecular Imaging, Hanzeplein 1, 9713 GZ Groningen, The Netherlands

<sup>2</sup> Current address: King's College London, Division of Imaging Sciences and Biomedical Engineering, Strand, London WC2R 2LS, United Kingdom

<sup>3</sup> University of Groningen, Research Group of Molecular Neurobiology, Nijenborgh 7, 9747 AG Groningen, The Netherlands

<sup>4</sup> Department of Morphology and Physiology, Semmelweis University, 17 Vas, H-1088 Budapest, Hungary

<sup>5</sup> Tokyo Metropolitan Institute of Gerontology, Research Team for Neuroimaging, 35-2 Sakae-cho, Itabashi-ku, Tokyo 173-0015, Japan

Corresponding author: Aren van Waarde, e-mail: [a.van.waarde@umcg.nl](mailto:a.van.waarde@umcg.nl), Telephone: +31-50-3613215, Telefax: +31-50-361168

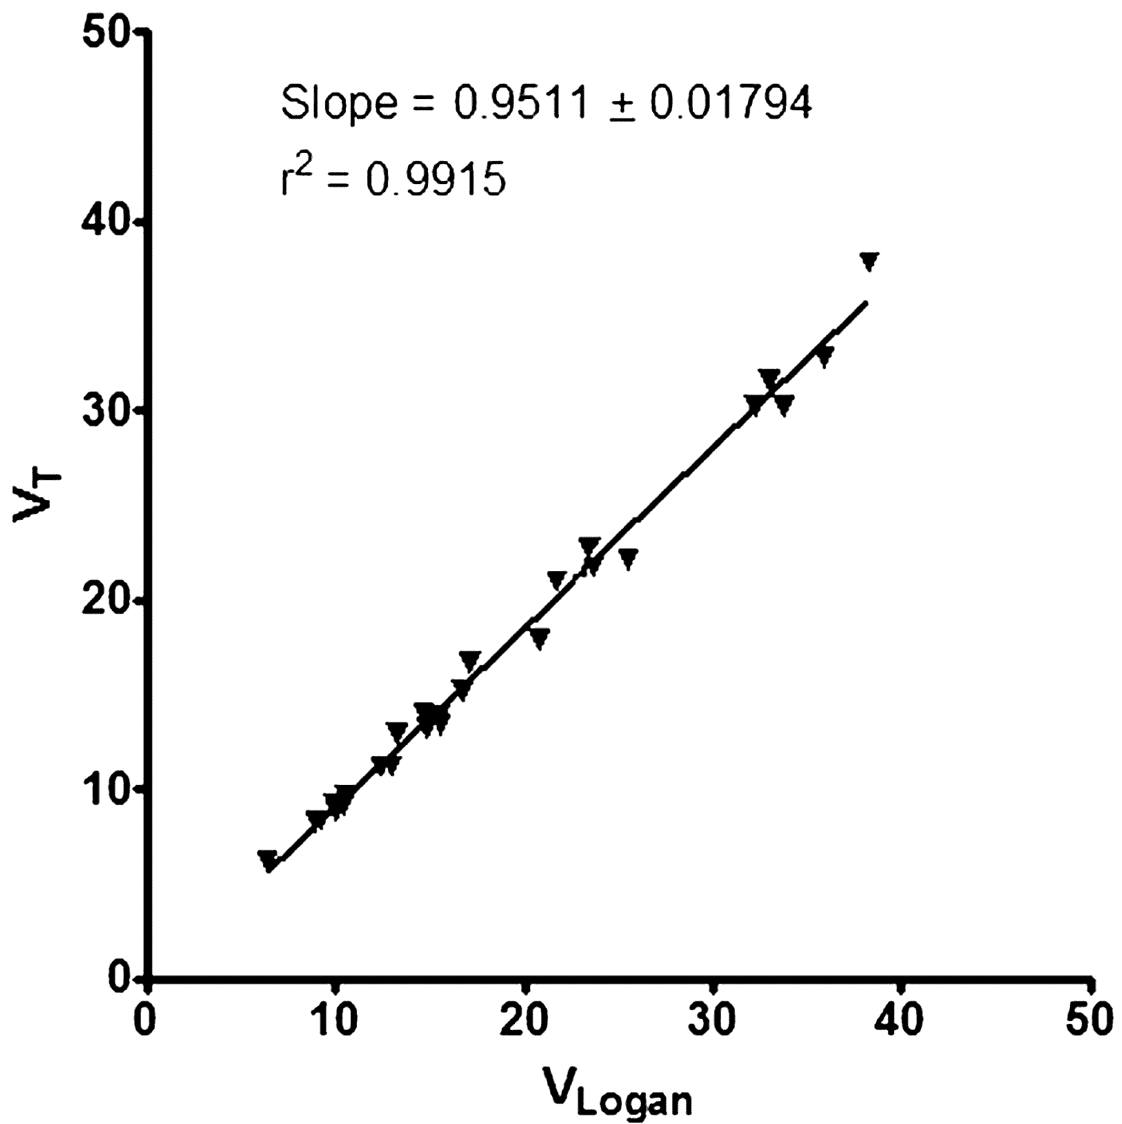

**Supplemental Figure 1:**  $V_T$  values calculated from a 2-TCM fit or by Logan graphical analysis were strongly correlated ( $r^2 = 0.99$ ,  $P < 0.0001$ ), Logan analysis leading to a slight underestimation of about 5% (see supplementary data).
